# Supplementary material for: Organic Carbon and Nitrogen Isoscapes of Reef Corals and Algal Symbionts: Relative Influences of Environmental Gradients and Heterotrophy
Source: PubMed Central journal article supplement (PMC7464353; doi:10.3390/microorganisms8081221), 2020-08-11
Supplement: microorganisms-08-01221-s001.pdf [file microorganisms-08-01221-s001.pdf]

Article

# Organic carbon and nitrogen isoscapes of reef corals and algal symbionts: Relative influences of environmental gradients and heterotrophy

Supplementary materials

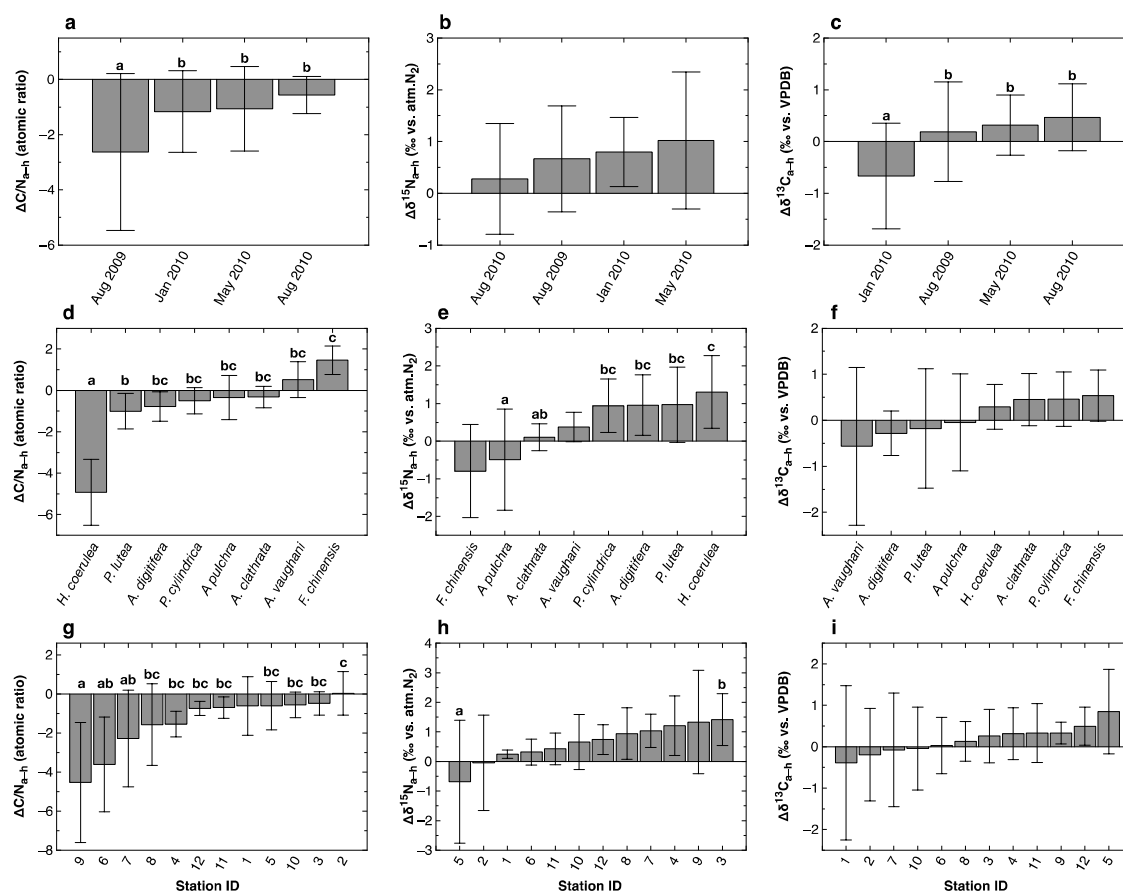

**Figure S1.** Differences in C/N atomic ratios ( $\Delta C/N_{a-h}$ ; **a, d, g**), bulk  $\delta^{15}N$  values ( $\Delta \delta^{15}N_{a-h}$ ; **b, e, h**), and bulk  $\delta^{13}C$  values ( $\Delta \delta^{13}C_{a-h}$ ; **c, f, i**) between the algal symbiont and host coral fractions compared among seasons (**a–c**), species (**d–f**), and sampling sites (**g–i**). Differences among seasons, species, and sites were evaluated using the Tukey-Kramer multiple comparison test ( $\alpha = 0.05$ ); different characters at the top of the error bars indicate statistically significant differences. Lack of characters means no significant differences detected.

**Table S1.** Description of sampling sites and numbers of coral samples analyzed.

| Site ID | Location         |                   | Water depth (m)<br>at low tide |                                             | Number of coral samples* |          |          |          |         |
|---------|------------------|-------------------|--------------------------------|---------------------------------------------|--------------------------|----------|----------|----------|---------|
|         | Latitude<br>(°N) | Longitude<br>(°E) |                                |                                             | Aug 2009                 | Jan 2010 | May 2010 | Aug 2010 | Total   |
| 1       | 24.5950          | 124.3108          | 1.0                            | Shallow reef flat                           | 3 (0)                    | 0 (0)    | 0 (0)    | 0 (0)    | 3 (0)   |
| 2       | 24.5712          | 124.2982          | 1.0                            | Shallow reef flat                           | 6 (0)                    | 0 (0)    | 7 (0)    | 0 (0)    | 13 (0)  |
| 3       | 24.4231          | 124.2558          | 2.0                            | Near a big channel across<br>the reef crest | 0 (0)                    | 0 (0)    | 8 (0)    | 0 (0)    | 8 (0)   |
| 4       | 24.3842          | 124.2553          | 2.0                            | Close to the Todoroki River<br>mouth        | 5 (0)                    | 0 (0)    | 4 (0)    | 0 (0)    | 9 (0)   |
| 5       | 24.3706          | 124.2551          | 2.0                            | Shallow reef flat                           | 0 (0)                    | 0 (0)    | 0 (0)    | 4 (0)    | 4 (0)   |
| 6       | 24.3652          | 124.2575          | 0.5                            | Close to the reef crest                     | 10 (5)                   | 0 (0)    | 0 (0)    | 0 (0)    | 10 (5)  |
| 7       | 24.3646          | 124.2552          | 1.0                            | Shallow reef flat                           | 10 (5)                   | 10 (3)   | 0 (0)    | 0 (0)    | 20 (8)  |
| 8       | 24.3652          | 124.2537          | 1.0                            | Shallow reef flat                           | 0 (0)                    | 8 (4)    | 14 (6)   | 0 (0)    | 22 (10) |
| 9       | 24.3649          | 124.2510          | 0.5                            | Groundwater-affected area                   | 8 (5)                    | 0 (0)    | 0 (0)    | 0 (0)    | 8 (5)   |
| 10      | 24.3394          | 124.1989          | 1.0                            | Close to a sewage outfall                   | 0 (0)                    | 7 (0)    | 6 (0)    | 4 (0)    | 17 (0)  |
| 11      | 24.3410          | 124.0961          | 2.0                            | Inside Sekisei Lagoon                       | 0 (0)                    | 0 (0)    | 0 (0)    | 6 (0)    | 6 (0)   |
| 12      | 24.3484          | 123.9521          | 5.0                            | Inside Sekisei Lagoon                       | 0 (0)                    | 0 (0)    | 0 (0)    | 6 (0)    | 6 (0)   |

\* Number in parenthesis indicates the sample number of *Heliopora coerulea*.

**Table S2.** Seasonal differences in C/N ratios,  $\delta^{13}\text{C}$  values and  $\delta^{15}\text{N}$  values of algal symbionts and host corals evaluated via ANOVA with Bonferroni–Dunn post-hoc analysis.

| Coral species              | Site ID | Seasons compared                   | Algal symbionts |                       |                       | Host corals |                       |                       |
|----------------------------|---------|------------------------------------|-----------------|-----------------------|-----------------------|-------------|-----------------------|-----------------------|
|                            |         |                                    | C/N             | $\delta^{15}\text{N}$ | $\delta^{13}\text{C}$ | C/N         | $\delta^{15}\text{N}$ | $\delta^{13}\text{C}$ |
| <i>Acropora digitifera</i> | 10      | Jan 2010 vs. May 2010 vs. Aug 2010 | ns              | ns                    | ns                    | – *         | ns                    | ns                    |
| <i>Acropora pulchra</i>    | 2       | Aug 2009 vs. May 2010              | ns              | ns                    | ns                    | Aug < May * | May < Aug **          | May < Aug *           |
| <i>Heliopora coerulea</i>  | 7       | Aug 2009 vs. Jan 2010              | ns              | Jan < Aug ***         | Jan < Aug ***         | ns          | ns                    | Jan < Aug **          |
| <i>Heliopora coerulea</i>  | 8       | Jan 2010 vs. May 2010              | ns              | ns                    | ns                    | ns          | ns                    | ns                    |
| <i>Porites cylindrica</i>  | 8       | Jan 2010 vs. May 2010              | ns              | ns                    | ns                    | ns          | Jan < May *           | ns                    |
| <i>Porites lutea</i>       | 4       | Aug 2009 vs. May 2010              | Aug < May *     | ns                    | ns                    | ns          | May < Aug **          | Aug < May *           |
| <i>Porites lutea</i>       | 10      | Jan 2010 vs. May 2010              | ns              | ns                    | Jan < May **          | ns          | ns                    | ns                    |

† Difference of means is shown only when it is statistically significant by ANOVA (\*:  $p < 0.05$ ; \*\*:  $p < 0.01$ ; \*\*\*:  $p < 0.001$ . ns: no significant difference was detected between seasons by ANOVA. –: no significant difference was detected by Bonferroni–Dunn post-hoc analysis.

**Table S3.** Species-specific differences in C/N ratios,  $\delta^{13}\text{C}$  values, and  $\delta^{15}\text{N}$  values of algal symbionts and host corals evaluated via ANOVA with Bonferroni–Dunn post-hoc analysis.

| Station | Season   | Species compared <sup>§</sup> | Algal symbionts |                       |                       | Host corals     |                       |                       |
|---------|----------|-------------------------------|-----------------|-----------------------|-----------------------|-----------------|-----------------------|-----------------------|
|         |          |                               | C/N             | $\delta^{15}\text{N}$ | $\delta^{13}\text{C}$ | C/N             | $\delta^{15}\text{N}$ | $\delta^{13}\text{C}$ |
| 2       | Aug 2009 | Ap vs. Av                     | ns              | Ap < Av<br>*          | ns                    | Ap < Ac *       | ns                    | Ap < Av *             |
| 2       | May 2010 | Ap vs. Pl                     | ns              | ns                    | Ap < Pl *             | ns              | ns                    | Ap < Pl *             |
| 3       | May 2010 | Pc vs. Pl                     | ns              | ns                    | ns                    | Pc < Pl ***     | Pc < Pl *             | Pc < Pl *             |
| 6       | Aug 2009 | Ad vs. Ap vs. Hc              | ns              | ns                    | Ad, Ap < Hc **        | Ad, Ap < Hc **  | Hc < Ad, Ap **        | Ad, Ap < Hc **        |
| 7       | Aug 2009 | Hc vs. Pc                     | Pc < Hc **      | Hc < Pc **            | ns                    | Pc < Hc ***     | Hc < Pc ***           | ns                    |
| 7       | Jan 2010 | Ap vs. Hc vs. Pl              | Ap < Hc *       | Ap, Hc < Pl **        | Ap < Hc *             | Ap, Pl < Hc *** | ns                    | Ap < Hc < Pl ***      |
| 8       | Jan 2010 | Hc vs. Pc                     | Pc < Hc ***     | Hc < Pc ***           | ns                    | Pc < Hc ***     | ns                    | ns                    |
| 8       | May 2010 | Fc vs. Hc vs. Pc              | ns              | ns                    | ns                    | Fc, Pc < Hc *** | Hc < Pc < Fc ***      | ns                    |
| 9       | Aug 2009 | Hc vs. Pc                     | Pc < Hc *       | Hc < Pc *             | ns                    | Pc < Hc **      | Hc < Pc **            | ns                    |
| 10      | Jan 2010 | Ad vs. Pl                     | ns              | ns                    | ns                    | Ad < Pl *       | Ad < Pl *             | Ad < Pl **            |
| 10      | May 2010 | Ad vs. Pl                     | Ad < Pl *       | ns                    | Ad < Pl ***           | ns              | ns                    | Ad < Pl **            |
| 10      | Aug 2010 | Ac vs. Ad                     | ns              | ns                    | ns                    | ns              | ns                    | ns                    |
| 11      | Aug 2010 | Ac vs. Ad                     | Ad < Ac **      | ns                    | ns                    | ns              | Ad < Ac *             | ns                    |
| 12      | Aug 2010 | Ac vs. Pc                     | Ac < Pc ****    | Pc < Ac ***           | Pc < Ac **            | Ac < Pc ***     | Pc < Ac ***           | Pc < Ac ***           |

Difference of means is shown only when it is statistically significant by ANOVA (\*:  $p < 0.05$ ; \*\*:  $p < 0.01$ ; \*\*\*:  $p < 0.001$ . ns: no significant difference was detected between seasons by ANOVA. <sup>§</sup> Ac, *Acropora clathrata*; Ad, *A. digitifera*; Ap, *A. pulchra*; Av, *A. vaughani*; Fc, *Favites chinensis*; Hc, *Heliopora coerulea*; Pc, *Porites cylindrica*; Pl, *P. lutea*.

**Table S4.** Site-specific differences in C/N ratios,  $\delta^{13}\text{C}$  values, and  $\delta^{15}\text{N}$  values of algal symbionts and host corals evaluated via ANOVA with Bonferroni–Dunn post-hoc analysis.

| Coral species              | Season   | Stations compared    | Algal symbionts |                       |                       | Host corals |                       |                       |
|----------------------------|----------|----------------------|-----------------|-----------------------|-----------------------|-------------|-----------------------|-----------------------|
|                            |          |                      | C/N             | $\delta^{15}\text{N}$ | $\delta^{13}\text{C}$ | C/N         | $\delta^{15}\text{N}$ | $\delta^{13}\text{C}$ |
| <i>Acropora clathrata</i>  | Aug 2010 | 10 vs. 11 vs. 12     | ns              | 11, 12 < 10 ***       | ns                    | ns          | 11, 12 < 10 ***       | ns                    |
| <i>Acropora digitifera</i> | Aug 2010 | 10 vs. 11            | 11 < 10 *       | 11 < 10 **            | ns                    | ns          | 11 < 10 **            | ns                    |
| <i>Acropora pulchra</i>    | Aug 2009 | 1 vs. 2 vs. 6        | ns              | 2, 6 < 1 ***          | ns                    | ns          | 6 < 1 **              | ns                    |
| <i>Heliopora coerulea</i>  | Aug 2009 | 6 vs. 7 vs. 9        | ns              | 6, 7 < 9 ***          | ns                    | ns          | 7 < 9 *               | ns                    |
| <i>Heliopora coerulea</i>  | Jan 2010 | 7 vs. 8              | ns              | 7 < 8 ***             | ns                    | ns          | 7 < 8 **              | 7 < 8 **              |
| <i>Porites cylindrica</i>  | Aug 2009 | 7 vs. 9              | 9 < 7 *         | 7 < 9 ***             | ns                    | ns          | 7 < 9 ***             | ns                    |
| <i>Porites cylindrica</i>  | May 2010 | 3 vs. 8              | ns              | 3 < 8 *               | ns                    | ns          | 3 < 8 ***             | 3 < 8 *               |
| <i>Porites lutea</i>       | Jan 2010 | 7 vs. 10             | ns              | 7 < 10 ***            | ns                    | ns          | 7 < 10 ***            | ns                    |
| <i>Porites lutea</i>       | May 2010 | 2 vs. 3 vs. 4 vs. 10 | ns              | – *                   | 2, 4 < 10 *           | 10 < 2 *    | 2, 3 < 4 < 10 ***     | ns                    |

Difference of means is shown only when it is statistically significant by ANOVA (\*:  $p < 0.05$ ; \*\*:  $p < 0.01$ ; \*\*\*:  $p < 0.001$ ). ns: no significant difference was detected between seasons by ANOVA. –: no significant difference was detected by Bonferroni–Dunn post-hoc analysis.

**Table S5.** Amino acid compositions (mole-%) of the host coral and symbiotic algal fractions of coral holobionts (n = 10).

|                                   | Ala       | Gly        | Val       | Leu       | Ile       | Asx        | Thr       | Ser       | Met       | Glx        | Phe       | His       | Tyr       | Arg       | Lys       |
|-----------------------------------|-----------|------------|-----------|-----------|-----------|------------|-----------|-----------|-----------|------------|-----------|-----------|-----------|-----------|-----------|
| This study                        |           |            |           |           |           |            |           |           |           |            |           |           |           |           |           |
| – Host coral                      | 6.8 ± 0.6 | 10.7 ± 1.7 | 6.7 ± 0.7 | 7.0 ± 0.9 | 4.6 ± 0.6 | 12.3 ± 3.2 | 5.5 ± 1.6 | 7.9 ± 1.8 | 0.0 ± 0.0 | 23.9 ± 5.9 | 3.8 ± 1.3 | 1.4 ± 0.6 | 0.5 ± 0.8 | 4.1 ± 0.7 | 4.2 ± 1.3 |
| – Algal symbiont                  | 8.4 ± 0.3 | 12.0 ± 1.3 | 7.5 ± 0.4 | 8.5 ± 0.8 | 5.3 ± 0.5 | 12.1 ± 1.3 | 6.1 ± 0.3 | 7.0 ± 0.4 | 0.1 ± 0.2 | 18.0 ± 3.7 | 3.7 ± 0.7 | 1.7 ± 0.4 | 1.2 ± 0.9 | 5.4 ± 0.9 | 3.9 ± 1.0 |
| Fitzgerald and Szmant (1997) [72] |           |            |           |           |           |            |           |           |           |            |           |           |           |           |           |
| – Host coral*                     | 7–8       | 8–11       | 7–8       | 7–10      | 5–6       | 11–13      | 6–7       | 7–8       | 1–2       | 13–15      | 4–5       | 3–4       | 2–5       | 4–6       | 5–7       |

\* Protein samples precipitated by trichloroacetic acid from suspension of host coral tissue.

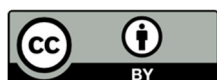

© 2020 by the author. Licensee MDPI, Basel, Switzerland. This article is an open access article distributed under the terms and conditions of the Creative Commons Attribution (CC BY) license (<http://creativecommons.org/licenses/by/4.0/>).
